# Supplementary material for: Quantifying the impact of quarantine duration on COVID-19 transmission
Source: eLife journal article supplement (doi:10.7554/elife.63704), 2021-02-05
Supplement: supp [file elife_poa_e63704_Figure_2_figure_supplement_1.pdf › elife_poa_e63704_Figure_2_figure_supplement_1.pdf]

**A**

fraction of transmission prevented by quarantine

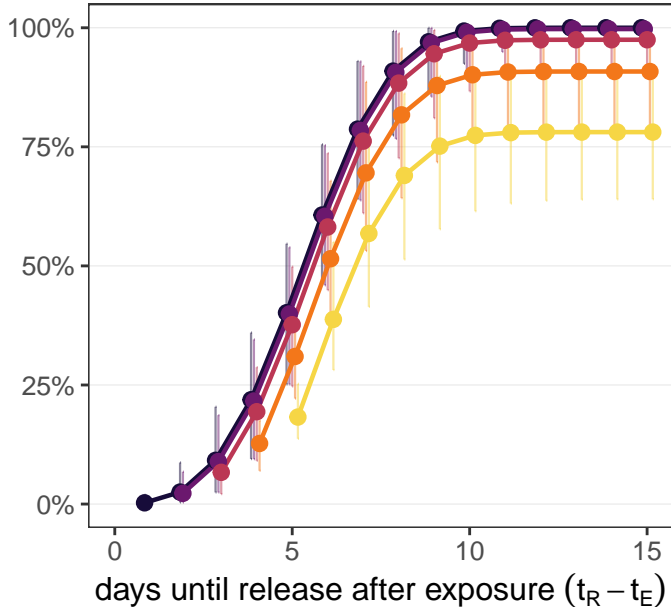**B**

relative utility of quarantine

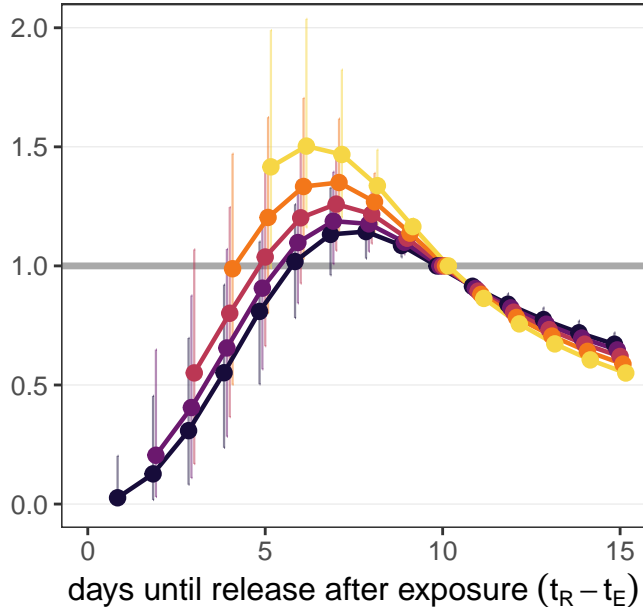

delay between exposure and the start of quarantine ( $t_Q - t_E$ )    0 days    1 day    2 days    3 days    4 days
