# Supplementary material for: Quantifying the impact of quarantine duration on COVID-19 transmission
Source: eLife journal article supplement (doi:10.7554/elife.63704), 2021-02-05
Supplement: supp [file elife_poa_e63704_Figure_4_figure_supplement_2.pdf › elife_poa_e63704_Figure_4_figure_supplement_2.pdf]

**A**relative adherence required  
to maintain quarantine efficacy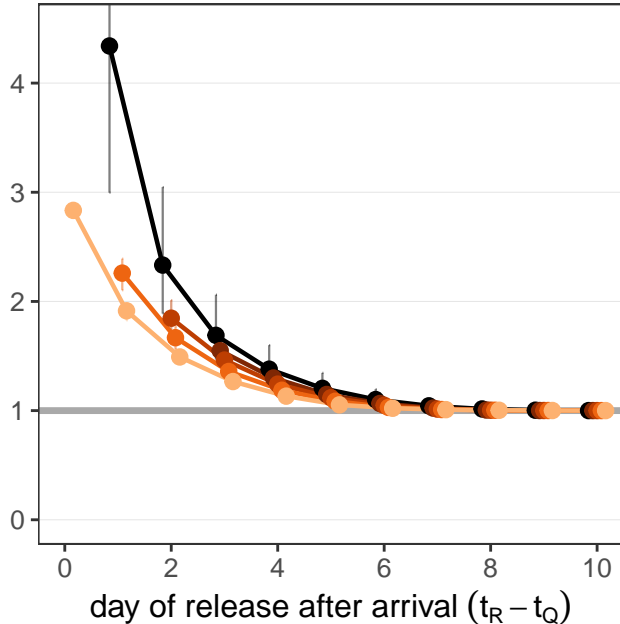delay between test and release ( $t_R - t_T$ )

- no test
- 3 days
- 2 days
- 1 day
- 0 days

**B**fraction of local transmission  
prevented by quarantine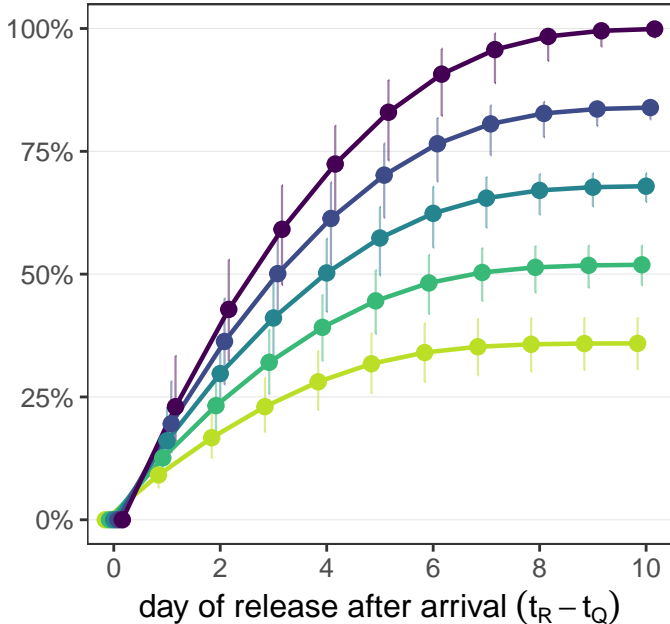fraction asymptomatic ( $a$ )

- 0%
- 25%
- 50%
- 75%
- 100%
