# Supplementary figures and images for: Quantifying the impact of quarantine duration on COVID-19 transmission
Source: eLife journal article supplement (doi:10.7554/elife.63704), 2021-02-05

**A**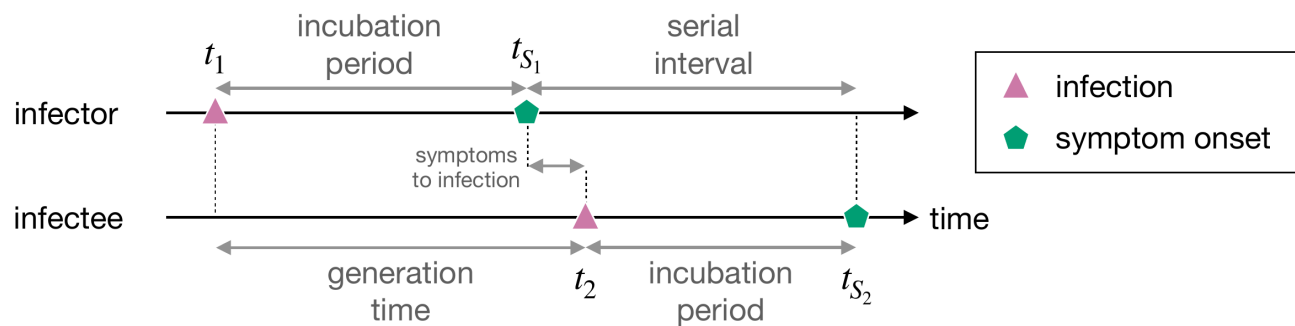**B**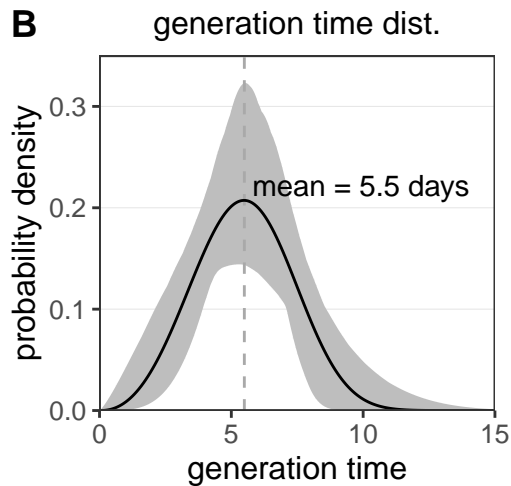**C**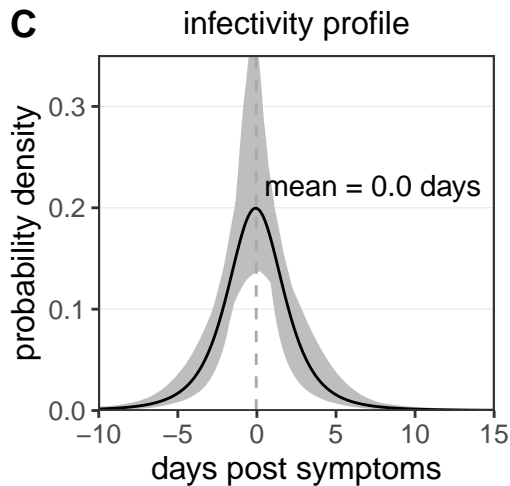**D**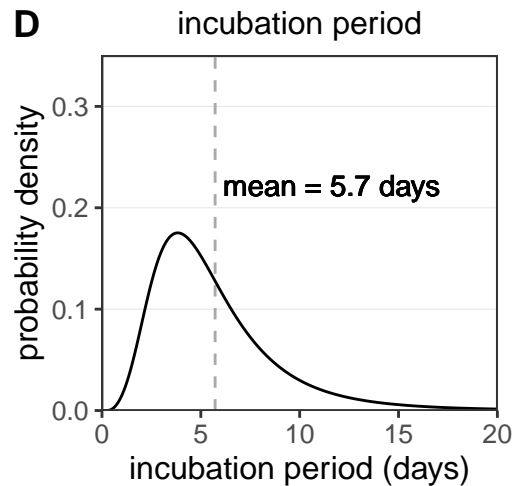

Supplement: supp [file elife_poa_e63704_Figure_1_figure_supplement_1.pdf › elife_poa_e63704_Figure_1_figure_supplement_1.pdf]

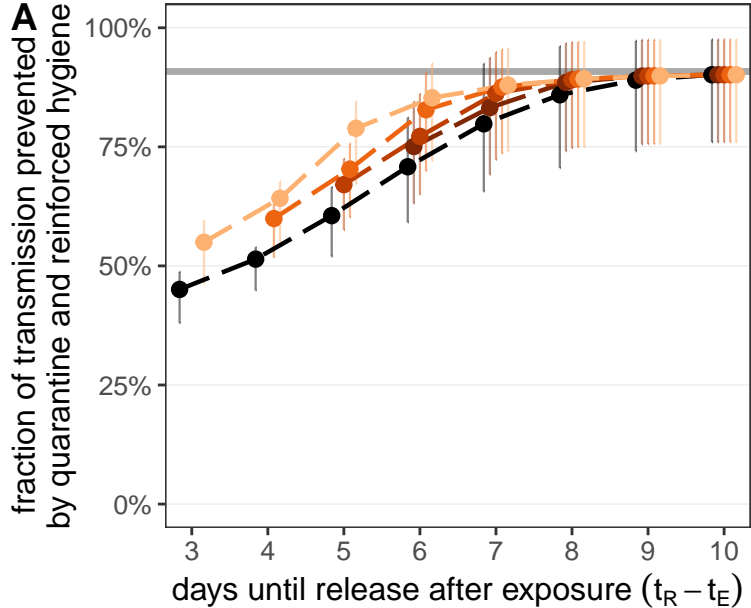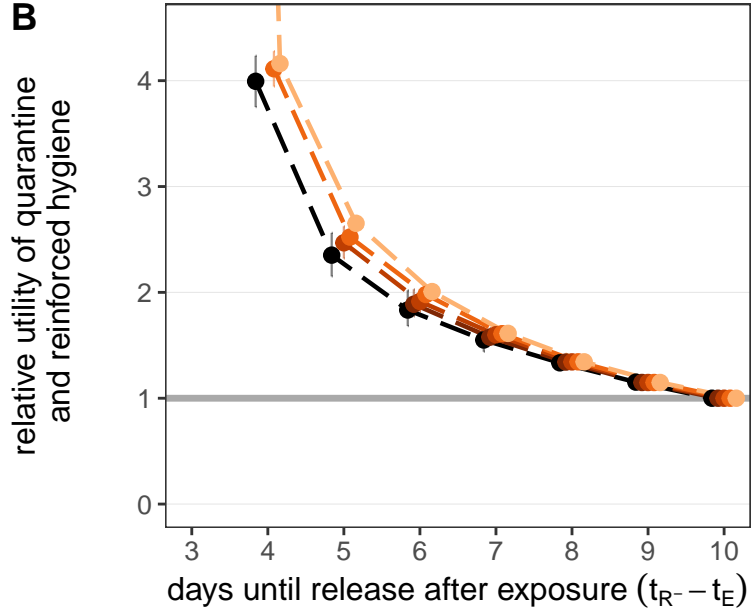

delay between test and release ( $t_R - t_T$ )    no test    3 days    2 days    1 day    0 days

Supplement: supp [file elife_poa_e63704_Figure_2_figure_supplement_2.pdf › elife_poa_e63704_Figure_2_figure_supplement_2.pdf]

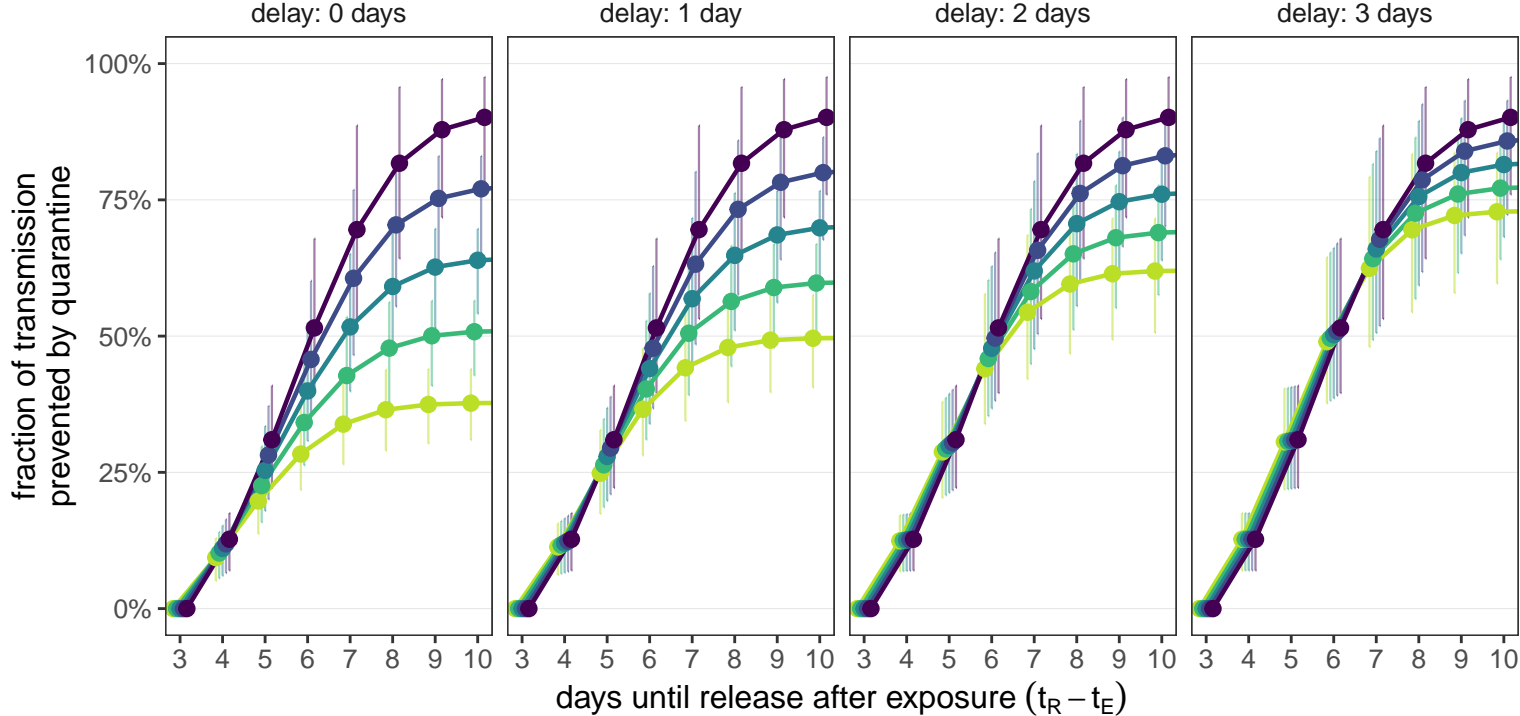

fraction asymptomatic ( $a$ )    0%    25%    50%    75%    100%

Supplement: supp [file elife_poa_e63704_Figure_3_figure_supplement_1.pdf › elife_poa_e63704_Figure_3_figure_supplement_1.pdf]

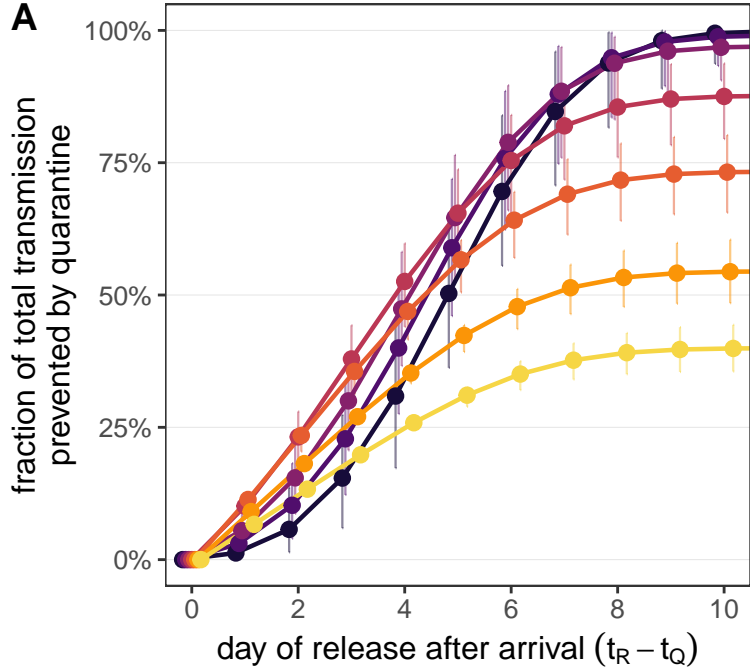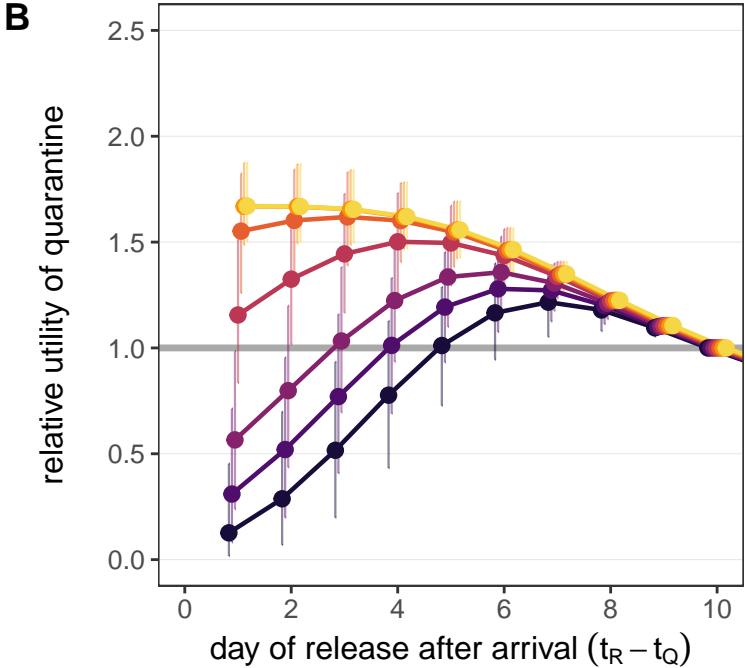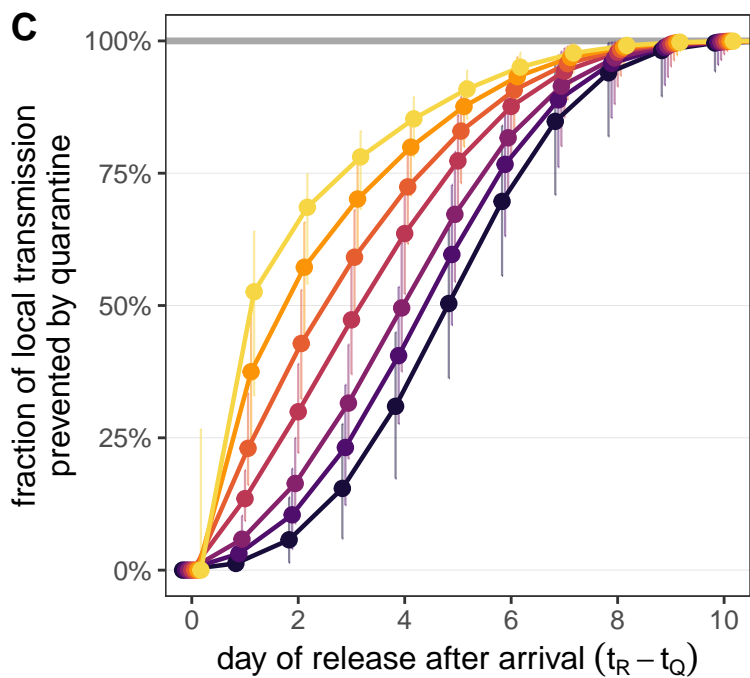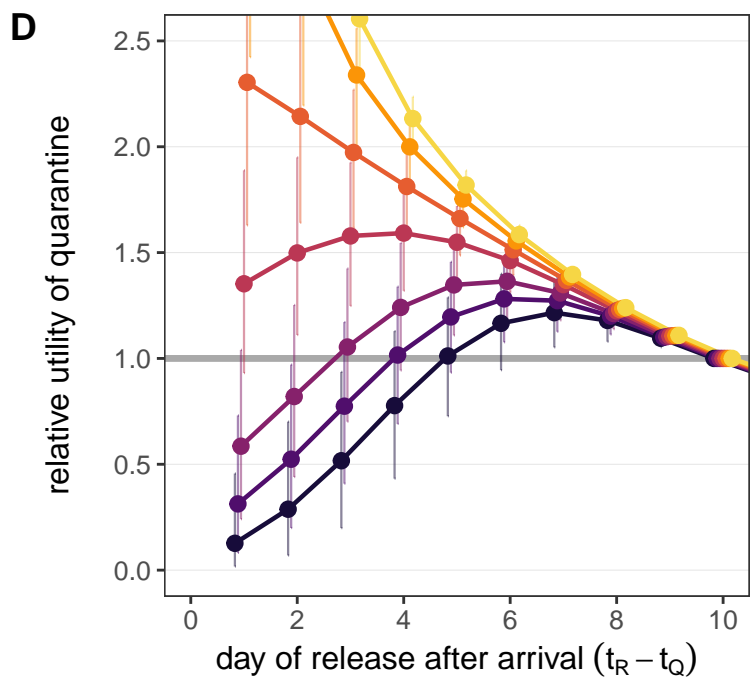

duration of travel ( $y$ )    1 day    2 days    3 days    5 days    7 days    10 days    14 days

Supplement: supp [file elife_poa_e63704_Figure_4_figure_supplement_1.pdf › elife_poa_e63704_Figure_4_figure_supplement_1.pdf]

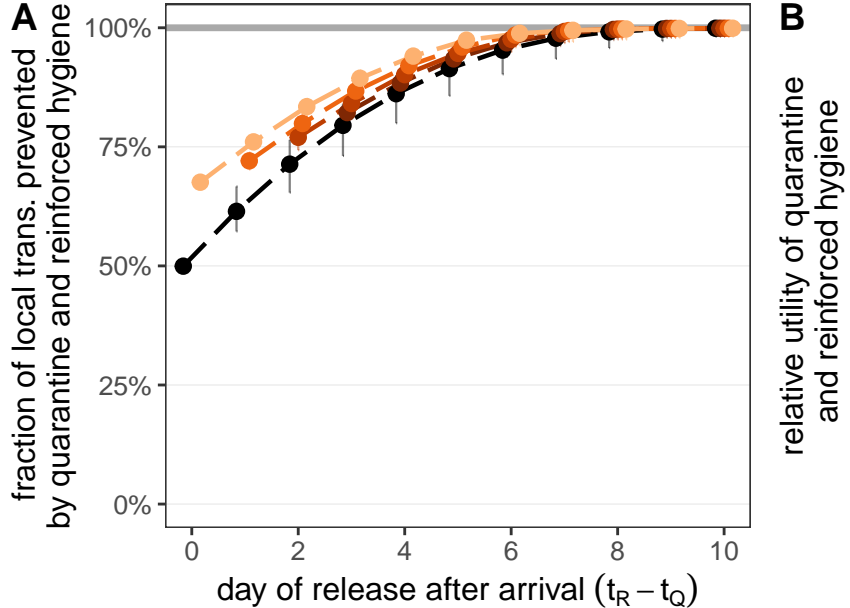

delay between test and release ( $t_R - t_T$ )    ● no test    ● 3 days    ● 2 days    ● 1 day    ● 0 days

Supplement: supp [file elife_poa_e63704_Figure_4_figure_supplement_3.pdf › elife_poa_e63704_Figure_4_figure_supplement_3.pdf]
